RESEARCH ARTICLE

# Efficacy and safety data in elderly patients with metastatic renal cell carcinoma included in the nivolumab Expanded Access Program (EAP) in Italy

Maria Giuseppa Vitale<sup>1\*</sup>, Sarah Scagliarini<sup>2</sup>, Luca Galli<sup>3</sup>, Sandro Pignata<sup>4</sup>, Giovanni Lo Re<sup>5</sup>, Alfredo Berruti<sup>6</sup>, Carlotta Defferrari<sup>7</sup>, Massimiliano Spada<sup>8</sup>, Cristina Masini<sup>9</sup>, Daniele Santini<sup>10</sup>, Libero Ciuffreda<sup>11</sup>, Enzo Maria Ruggeri<sup>12</sup>, Carmelo Bengala<sup>13</sup>, Lorenzo Livi<sup>14</sup>, Daniele Fagnani<sup>15</sup>, Andrea Bonetti<sup>16</sup>, Lucio Giustini<sup>17</sup>, Alketa Hamzaj<sup>18</sup>, Giuseppe Procopio<sup>19</sup>, Claudia Caserta<sup>20</sup>, Roberto Sabbatini<sup>1</sup>

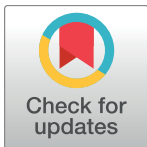

**OPEN ACCESS**

**Citation:** Vitale MG, Scagliarini S, Galli L, Pignata S, Lo Re G, Berruti A, et al. (2018) Efficacy and safety data in elderly patients with metastatic renal cell carcinoma included in the nivolumab Expanded Access Program (EAP) in Italy. PLoS ONE 13(7): e0199642. <https://doi.org/10.1371/journal.pone.0199642>

**Editor:** Donald P. Bottaro, National Institute of Health, UNITED STATES

**Received:** April 20, 2018

**Accepted:** June 11, 2018

**Published:** July 6, 2018

**Copyright:** © 2018 Vitale et al. This is an open access article distributed under the terms of the [Creative Commons Attribution License](https://creativecommons.org/licenses/by/4.0/), which permits unrestricted use, distribution, and reproduction in any medium, provided the original author and source are credited.

**Data Availability Statement:** All relevant data are within the paper and its Supporting Information file.

**Funding:** This research received no specific grant from any funding agency in the public, commercial, or not-for-profit sectors.

**Competing interests:** The authors received honoraria for an advisory role and/or grants/reimbursements for participation in scientific events from BMS. This does not alter our

**1** Azienda Ospedaliera Universitaria di Modena, Modena, Italy, **2** AORN A. Cardarelli, Napoli, Italy, **3** Azienda Ospedaliero Universitaria Pisana, Pisa, Italy, **4** Istituto Nazionale Tumori IRCCS Fondazione Pascale, Napoli, Italy, **5** Azienda Ospedaliera Santa Maria Degli Angeli, Pordenone, Italy, **6** Azienda Socio Sanitaria Territoriale degli Spedali Civili di Brescia, Brescia, Italy, **7** Ospedale Galliera, Genova, Italy, **8** Fondazione istituto Giglio, Cefalu, Italy, **9** Arcispedale Santa Maria Nuova di Reggio Emilia, Reggio Emilia, Italy, **10** Policlinico Universitario Campus Bio-Medico, Roma, Italy, **11** Azienda Ospedaliero Universitaria Citta della Salute e della Scienza, Torino, Italy, **12** Ospedale di Belcolle, Viterbo, Italy, **13** USL 9 Presidio Ospedaliero della Misericordia, Grosseto, Italy, **14** Università di Firenze, Firenze, Italy, **15** ASST DI Vimercate, Vimercate, Italy, **16** Mater Salutis Hospital, Legnago, Italy, **17** Area Vasta 4, Fermo, Italy, **18** Azienda USL 8 Arezzo, Italy, **19** Fondazione IRCCS Istituto Nazionale Tumori, Milano, Italy, **20** Azienda Ospedaliera Santa Maria di Terni, Terni, Italy

\* [vitalemariag@gmail.com](mailto:vitalemariag@gmail.com)

## Abstract

### Background

Results from phase III clinical trial CheckMate 025 have established nivolumab as the standard of care for treatment of metastatic renal-cell carcinoma (mRCC) after VEGF inhibitor failure; however, elderly patients are under-represented in the registration trial and little is known about the activity of nivolumab in this subgroup. The purpose of the Expanded Access Program was to provide nivolumab to patients with mRCC who had progressed despite treatment with other agents that were considered standard of care.

### Methods

Nivolumab 3 mg/kg was administered intravenously every 2 weeks to a maximum of 24 months or until progression or unacceptable toxicity. The current analysis included all patients from the EAP Italian cohort who had received  $\geq 1$  dose of nivolumab. Adverse events (AEs) were monitored using Common Terminology Criteria for Adverse Events v4.0.

### Results

A total of 389 patients with advanced RCC were enrolled in the Italian cohort of the EAP and treated with nivolumab. Of these patients, 125 (32%) were at least 70 years of age and 70 (18%) were at least 75 years of age. Efficacy with nivolumab in the elderly patients was

adherence to PLOS ONE policies on sharing data and materials.

similar to that observed in the overall EAP population and in the CheckMate 025 trial. Safety was comparable between the elderly patients and the overall EAP population, and was consistent with what previously reported.

## Conclusion

The final results suggest that elderly patients with pretreated metastatic RCC may benefit from therapy with nivolumab.

## Introduction

As a result of aging populations, the incidence of tumours in the elderly patients, including renal cell carcinoma (RCC), continues to increase [1].

About half of the new diagnoses of renal cell carcinoma are reported in patients over 65 years of age, particularly in 25% of cases between 65 and 74 years and in another 25% of cases over 75 years [2–3].

Nivolumab is a human immunoglobulin G4 (IgG4) monoclonal antibody (HuMAb) that selectively blocks the interaction between programmed cell death 1 (PD-1), which is expressed on activated T cells, and PD-1 ligand 1 (PD-L1) and 2 (PD-L2), which are expressed on immune cells and tumor cells. The PD-1 receptor is a negative regulator of T cell activity that has been shown to be involved in immune responses of T cells in the micro-environment tumor. The interaction of PD-1 with PD-L1 and PD-L2 ligands, expressed by the cells presenting the antigen and which can be expressed by the tumor cell or other cells in the tumor micro-environment, results in inhibition of proliferation of T cell and secretion of cytokines. Nivolumab enhances T cell responses, including anti-tumor responses, through inhibition of PD1 binding to PD-L1 and PD-L2 ligands [4–5].

The FDA approved nivolumab in November 2015 as a treatment for patients with metastatic renal cell carcinoma following prior antiangiogenic-based therapy based on the results of an open-label, randomized phase III study CheckMate-025 trial, comparing nivolumab versus everolimus.

Patients received either 3 mg/kg of IV nivolumab every 2 weeks ( $n = 406$ ) or 10 mg of once daily oral everolimus ( $n = 397$ ) until disease progression or unacceptable toxicity [6].

The primary endpoint was overall survival (OS) and secondary endpoints included objective response rate (ORR), progression-free survival (PFS), quality of life (QoL) and safety.

As described in detail previously [6], Nivolumab demonstrated a better ORR (26% vs 5%). No differences in terms of PFS was evident (4.2 months for nivolumab versus 4.5 months for everolimus) (hazard ratio [HR], 0.85; 95% CI, 0.73–0.99;  $P = .0371$ ).

Nivolumab reduced the risk of death by 26% compared with everolimus in patients with previously treated mRCC, according to 3-year follow-up data from the phase III CheckMate-025 study.

Median OS was 25.8 months with nivolumab compared with 19.7 months for patients assigned to everolimus (HR, 0.74; 95% CI, 0.63–0.88;  $P = .0005$ ). The 3-year OS rate with nivolumab was 39% versus 30% with everolimus.

Real-World Data from an Italian EAP confirm data from the pivotal trial and suggest that nivolumab is effective for the treatment of mRCC in routine clinical practice.

Totally, 389 pts were enrolled in the EAP across 95 Italian sites: the best overall response rate was 17% including one complete and 66 partial responses, whereas 121 (31%) had stable disease. With a median follow-up of 7 months (range, 1 to 16), 6-month and 9-month survival

rates were 83% and 77%, respectively. Response and survival rates were comparable among pts regardless age, presence of brain or bone metastases and number of prior therapies [7].

The elderly represent a consistent portion of all cancer patients, but they are often under-represented in clinical trials [1].

Here, we report an analysis to evaluate the efficacy/safety profile of nivolumab in elderly ( $\geq 70$  years) or very elderly ( $\geq 75$  years) patients enrolled in the Italian cohort of the nivolumab Expanded Access Program.

Very elderly patients represented in the CheckMate-025 study and in the EAP, account for 8% and 19% of enrolled patients respectively.

## Materials and methods

### Patients

Eligible patients were 18 years of age or older, had histologic confirmation of advanced or metastatic renal-cell carcinoma with a clear-cell component and had received at least one prior therapy regimens (including, but not limited to, sunitinib, sorafenib, pazopanib, axitinib, tivozanib, bevacizumab, mTOR inhibitors) in the advanced or metastatic setting. Prior cytokine therapy (eg, IL-2, IFN- $\gamma$ ), vaccine therapy, or treatment with cytotoxics was also allowed.

All patients had a Karnofsky performance status of at least 70% at the time of study enrollment.

Key exclusion criteria were central nervous system metastases (CNS), a condition requiring treatment with steroids (equivalent to  $>10$  mg of prednisone daily), prior treatment with drugs targeting T-cell costimulation or checkpoint pathways (eg, anti-PD-1, anti-PD-L1, anti-PD-L2, anti-CD137, anti-CTLA-4), any other active malignancies or active, known, or suspected autoimmune disease or a condition requiring use of systemic immunosuppressive agents within 14 days prior to first dose. All patients signed an informed consent form.

### Study design

Nivolumab was administered at a dose of 3 mg per kilogram of body weight within 60-minute intravenous infusion every 2 weeks to a maximum of 24 months or until unacceptable toxicity, clear disease progression, or withdrawal of informed consent. Dose modifications were not permitted. Treatment beyond progression was allowed under protocol defined circumstances: investigator-assessed clinical benefit and do not have rapid disease progression, severe nivolumab-related AEs, stable performance status and no delay of imminent intervention to prevent serious complications of disease progression (eg, CNS metastases). Patient provided written informed consent prior to receiving additional nivolumab treatment. A radiographic assessment/scan was performed within 6 weeks of original PD to determine whether there has been a decrease in the tumor size or a further PD. The assessment of clinical benefit was balanced by clinical judgment as to whether the patient was clinically deteriorating and unlikely to receive any benefit from continued treatment with nivolumab.

The following medications were prohibited during the program (unless utilized to treat a drug-related adverse event): immunosuppressive agents, systemic corticosteroids  $> 10$  mg daily prednisone equivalent and any concurrent antineoplastic therapy. Surgical resection of lesions was permitted. Supportive care for disease-related symptoms and palliative care was offered to all patients at the discretion of the treating physician. Live vaccines was avoided while on study treatment. A brief course of corticosteroids for prophylaxis (eg, for contrast dye allergy) or for treatment of non-autoimmune conditions (eg, delayed-type hypersensitivity reaction caused by a contact allergen) was permitted. Limited field palliative radiation therapy for bone pain due to pre-existing bone metastasis was permitted.

This analysis evaluated the safety and efficacy of nivolumab in patients with previously treated advanced RCC in Italian patients enrolled in a worldwide expanded access program (EAP) in elderly ( $\geq 70$  years) or very elderly ( $\geq 75$  years) patients enrolled in the Italian cohort of the nivolumab Expanded Access Program who had received  $\geq 1$  dose of nivolumab.

Adverse events (AEs) were monitored throughout the program and graded using the National Cancer Institute Common Terminology Criteria for Adverse Events v4.0.

Objective response rate (ORR), progression-free survival (PFS), and OS were evaluated; the method and timing of assessments were at investigator discretion.

## Study oversight

This study was approved by the institutional review board or an independent ethics committee at each center (name of the coordinator ethics committee: “Comitato Etico Regionale per la Sperimentazione Clinica della Regione Toscana”, ID number: CA209-99M\_11098\_201\_2017) and was conducted in accordance with Good Clinical Practice guidelines, as defined by the International Conference on Harmonisation.

All the patients provided written informed consent that was based on the principles of the Declaration of Helsinki.

## Statistical analysis

Data were summarized using descriptive statistics; median and range were reported for quantitative variables and absolute frequencies and percentages for categorical items.

Survival curves were estimated with the Kaplan-Meier method.

## Results

### Patients

In total, 389 patients were enrolled in the Italian cohort of the EAP between August 2015 and April 2016 and treated with nivolumab.

Median follow-up was 11.9 (range 1–24.7). Median nivolumab dose was 13 (range, 1–49).

Of these 389 enrolled patients, 125 (32%) were at least 70 years of age and 70 (18%) were at least 75 years of age. Baseline patient characteristics are described in [Table 1](#).

Median age was 65 years for all patients, and lung was the most frequent site of metastasis, 73% in all patients and patients  $\geq 70$  and 69% in who had  $\geq 75$  years. The majority of patients had an ECOG performance status 0–1 in the three subgroups of patients and had received two or more previous regimen of antiangiogenic therapy for advanced renal-cell carcinoma: 79% in all patients, 72% in patients  $\geq 70$  years and 69% in patients  $\geq 75$  years.

### Efficacy

The objective response rate was 23% for all patients, 27% for patients  $\geq 70$  years of age and 28% for patients  $\geq 75$  years of age while Stable Disease was 32%, 35% and 34% respectively.

Response outcomes are shown in [Table 2](#) and [Fig 1](#).

The 6-, 12- and 18% month Overall Survival rates were, respectively:

- All patients = 80.2%, 64.1% and 21.8%
- $\geq 70$  years of age = 87.2%, 77.8% and 23.2%
- $\geq 75$  years of age = 83.6%, 77.7% and 22.8%

Kaplan–Meier estimates of OS are shown in [Fig 2](#).

Table 1. Demographics and baseline patient characteristics.

| Characteristics               | All patients<br>(N = 389) | ≥70 years<br>(N = 125) | ≥75 years<br>(N = 70) |
|-------------------------------|---------------------------|------------------------|-----------------------|
| Male, n (%)                   | 291 (75)                  | 94 (75)                | 51 (73)               |
| Median age (range), years     | 65 (34–85)                | 75 (70–85)             | 77 (75–85)            |
| ECOG PS, n (%)                |                           |                        |                       |
| 0                             | 176 (45)                  | 47 (38)                | 21 (30)               |
| 1                             | 174 (45)                  | 67 (54)                | 39 (56)               |
| 2                             | 24 (6)                    | 7 (6)                  | 6 (9)                 |
| NA                            | 15 (4)                    | 4 (3)                  | 4 (6)                 |
| Metastatic site, n (%)        |                           |                        |                       |
| Brain                         | 32 (8)                    | 3 (2)                  | 1 (1)                 |
| Bone                          | 193 (50)                  | 47 (38)                | 25 (36)               |
| Liver                         | 129 (33)                  | 40 (32)                | 21 (30)               |
| Lung                          | 286 (73)                  | 91 (73)                | 48 (69)               |
| No. of prior therapies, n (%) |                           |                        |                       |
| 1                             | 80 (21)                   | 34 (27)                | 21 (30)               |
| 2                             | 137 (35)                  | 40 (32)                | 25 (36)               |
| ≥3                            | 170 (44)                  | 50 (40)                | 23 (33)               |
| NA                            | 2 (<1)                    | 1 (1)                  | 1 (1)                 |
| IMCD                          |                           |                        |                       |
| 0                             | 62 (16)                   | 20 (16)                | 12 (17)               |
| 1–2                           | 212 (55)                  | 72 (58)                | 36 (51)               |
| > = 3                         | 33 (8)                    | 5 (4)                  | 5 (7)                 |
| NA                            | 82 (21)                   | 28 (22)                | 17 (24)               |

NA = not available.

<https://doi.org/10.1371/journal.pone.0199642.t001>

## Safety

Treatment-related adverse events of any grade occurred in 127 of the 389 patients (33%) in the general population, 37% in patients ≥70 years of age and 40% in patients ≥75 years.

Grade 3 or 4 treatment-related adverse events occurred in 27 of the 389 (7%) for all patients, in 6 of the 125 (5%) patients ≥70 years of age and in 3 of the 70 (4%) patients ≥75 years.

Although there is a slightly higher incidence of toxicity regardless the grade in the elderly and very elderly population, G3-4 Adverse Events are lower in these subgroups of patients.

The most common treatment-related AEs, of any grade, were fatigue (13%, 17% and 19% for all patients, patients ≥70 years and patients ≥75 years, respectively), skin and mucosal

Table 2. Response outcomes based on age subgroups.

| Best Response | All patients (%)<br>N = 389 | ≥70 years (%)<br>N = 125 | ≥75 years (%)<br>N = 70 |
|---------------|-----------------------------|--------------------------|-------------------------|
| CR            | 3 (1)                       | 1 (1)                    | 1 (1)                   |
| PR            | 87 (22)                     | 32 (26)                  | 19 (27)                 |
| SD            | 124 (32)                    | 44 (35)                  | 24 (34)                 |
| PD            | 141 (36)                    | 38 (30)                  | 19 (27)                 |
| NA            | 34 (9)                      | 10 (8)                   | 7 (10)                  |

CR = complete response; PD = progressive disease; PR = partial response; SD = stable disease.

<https://doi.org/10.1371/journal.pone.0199642.t002>

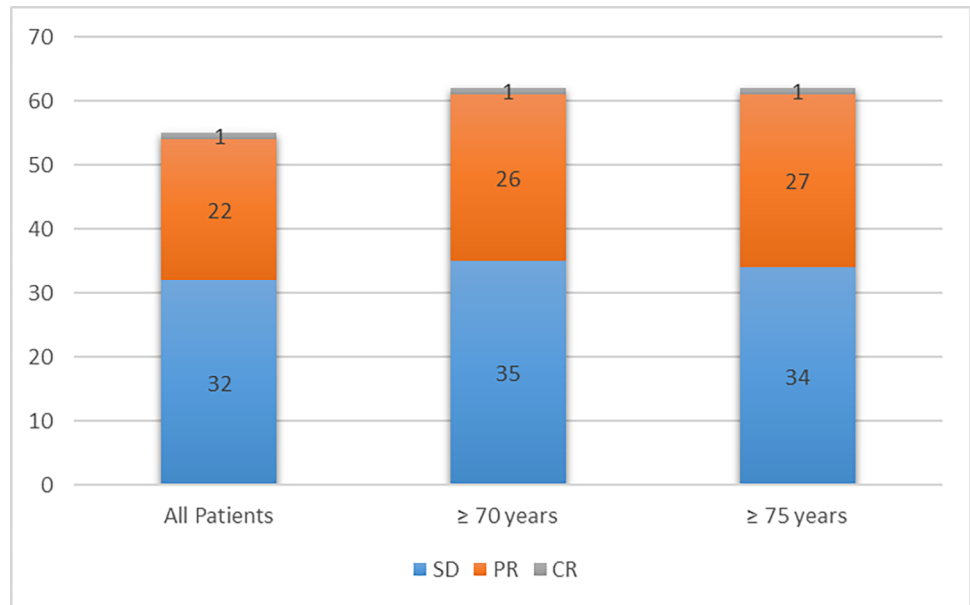

**Fig 1. Disease control rate based on age subgroups.**

<https://doi.org/10.1371/journal.pone.0199642.g001>

toxicity (10%, 9% and 11%, respectively) and gastrointestinal toxicity (9%, 10% and 13%, respectively)

The most frequent Grade 3 or 4 treatment-related adverse event was fatigue/asthenia 2%, 3% and 1% for all patients, patients  $\geq 70$  years and patients  $\geq 75$  years, respectively.

The safety outcomes for all patients, and patients  $\geq 70$  and  $\geq 75$  years, are shown in Table 3.

Overall, discontinuations of treatment with nivolumab in elderly and very elderly patients were consistent with those observed in the overall population (70%, 71% and 72%, respectively). Discontinuations due to treatment-related adverse events were similar in elderly patients (8%) and the overall population (8%) and slightly more frequent in very elderly patients (12%) (Table 4).

## Discussion

The population of elderly patients in trials conducted with molecular target drugs was always poorly represented [8]. The reasons may be various: a greater risk of adverse events and therefore reduced treatment tolerance, comorbidity, and reduced performance status. The available data are derived from only partially planned analyses performed on clinical trials or extended access programs.

Specifically, based on the results of phase III clinical trials, sunitinib, sorafenib, pazopanib, axitinib and everolimus are able to significantly increase disease-free survival regardless of the patient's age and the disease status. More recently, cabozantinib and nivolumab have been approved for the treatment of metastatic renal cell carcinoma after failure of an anti-VEGFR therapy. In METEOR trial [9], cabozantinib is able to achieve an improvement in OS compared to everolimus even in patients aged  $\geq 65$  years, while the benefit of nivolumab appears evident only in patients between 65 and 75 years (based on the results of CheckMate 025 [6]).

Some toxicities such as fatigue, anemia, appetite loss, dehydration, hand-foot-syndrome, stomatitis, diarrhoea, metabolic syndrome, infections, may contraindicate systemic treatment in elderly considered fragile patients.

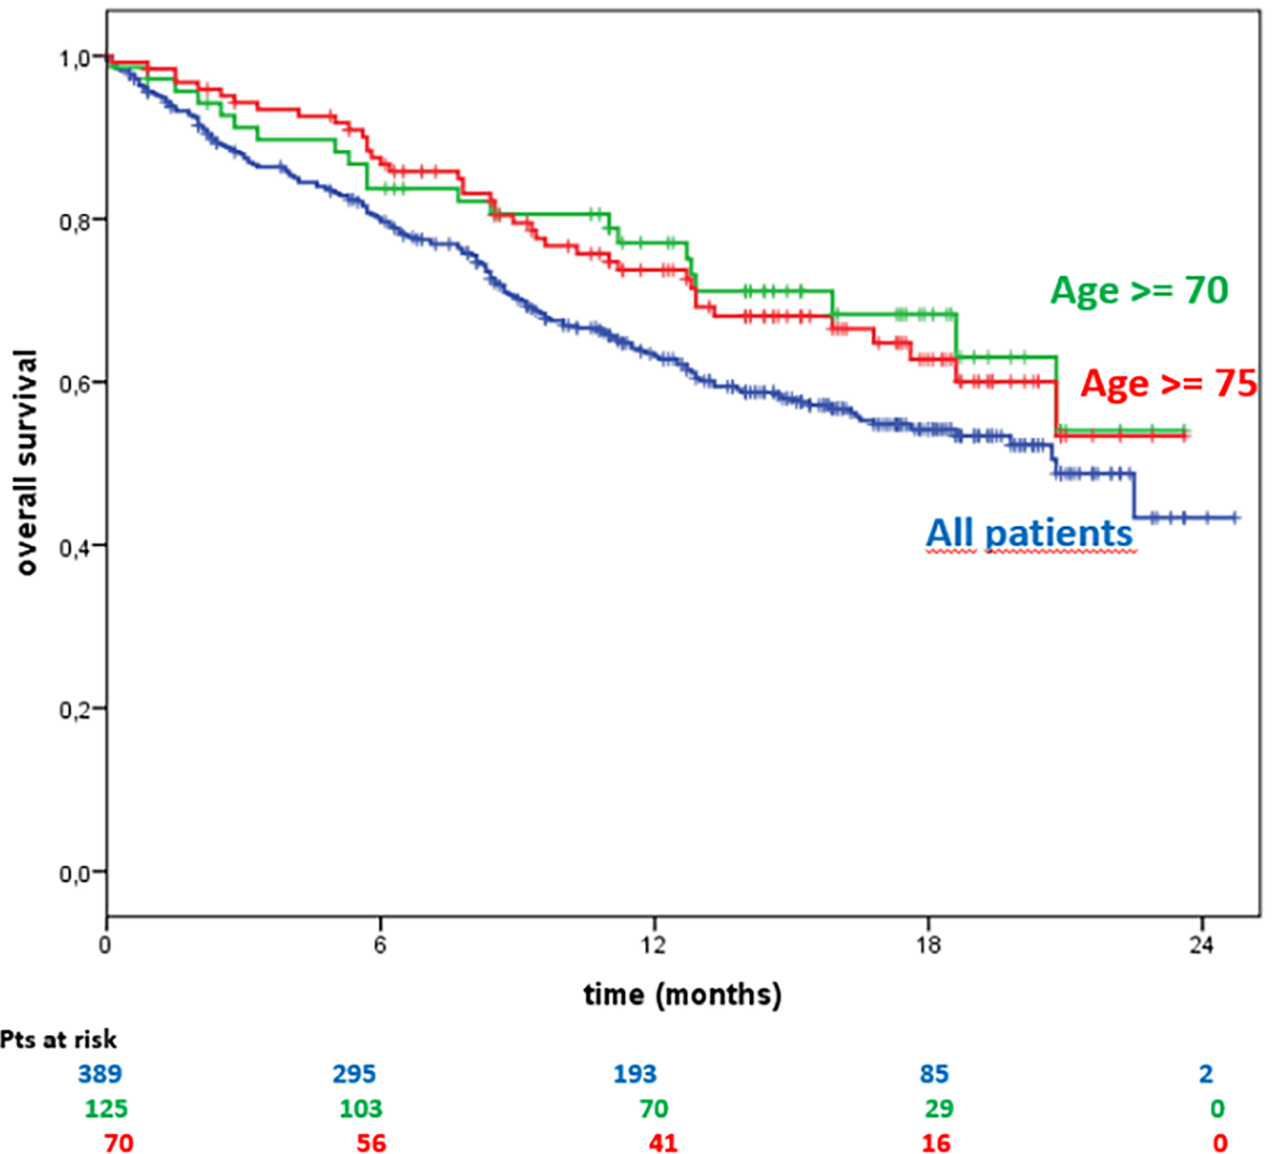

Fig 2. Overall survival based on age subgroups.

<https://doi.org/10.1371/journal.pone.0199642.g002>

The analysis of Italian expanded-access program of nivolumab in mRCC confirms the efficacy and safety of this agent in 389 patients in a real-world setting. Although the results presented here are limited by the nature of the expanded-access study design, these findings are particularly valuable due to the unselected patient population. Given that the proportion of the very elderly patients in this EAP was larger than that reported in the phase III CheckMate 025 trial (19% vs 8%), these results may provide insight into the use of nivolumab in the elderly population.

The nivolumab safety profile described here was consistent to that observed in the overall EAP population and in the CheckMate 025 trial<sup>6</sup>. Treatment-related AEs of any grade occurred in 33% of global population, 37% in patients  $\geq 70$  years of age and 40% in patients  $\geq 75$  years of age. These adverse events were lower compared with 79% in the CheckMate 025 trial.



Table 3. Treatment-related AEs in ≥1% of all patients, elderly and very elderly patients.

| Treatment-related AE         | All patients (n = 389)<br>Any grade, n (%) | All patients (n = 389)<br>Grade 3–4, n (%) | Elderly (N = 125)<br>Any grade, n (%) | Elderly (N = 125)<br>Grade 3–4, n (%) | Very elderly (n = 70)<br>Any grade, n (%) | Very elderly (n = 70)<br>Grade 3–4, n (%) |
|------------------------------|--------------------------------------------|--------------------------------------------|---------------------------------------|---------------------------------------|-------------------------------------------|-------------------------------------------|
| <b>Total</b>                 | 127 (33)                                   | 27 (7)                                     | 46 (37)                               | 6 (5)                                 | 28 (40)                                   | 3 (4)                                     |
| <b>General</b>               |                                            |                                            |                                       |                                       |                                           |                                           |
| Fatigue/asthenia             | 50 (13)                                    | 9 (2)                                      | 21 (17)                               | 4 (0)                                 | 13 (19)                                   | 1 (1)                                     |
| Pyrexia                      | 12 (3)                                     | 0 (0)                                      | 5 (4)                                 | 0 (0)                                 | 2 (3)                                     | 0 (0)                                     |
| Lack of appetite/anorexia    | 5 (1)                                      | 1 (0)                                      | 3 (2)                                 | 1 (1)                                 | 1 (1)                                     | 1 (1)                                     |
| <b>Skin and mucosal</b>      | 39 (10)                                    | 2 (1)                                      | 11 (9)                                | 0 (0)                                 | 8 (11)                                    | 0 (0)                                     |
| Rash                         | 34 (9)                                     | 2 (1)                                      | 9 (7)                                 | 0 (0)                                 | 6 (9)                                     | 0 (0)                                     |
| <b>Gastrointestinal</b>      | 34 (9)                                     | 5 (1)                                      | 13 (10)                               | 2 (2)                                 | 9 (13)                                    | 1 (1)                                     |
| Diarrhea                     | 19 (5)                                     | 3 (1)                                      | 8 (6)                                 | 1 (1)                                 | 6 (9)                                     | 1 (1)                                     |
| N/V                          | 8 (2)                                      | 2 (1)                                      | 3 (2)                                 | 1 (1)                                 | 0 (0)                                     | 0 (0)                                     |
| <b>Pain</b>                  | 9 (2)                                      | 0 (0)                                      | 5 (4)                                 | 0 (0)                                 | 4 (6)                                     | 0 (0)                                     |
| <b>Endocrine</b>             | 13 (3)                                     | 1 (0)                                      | 5 (4)                                 | 0 (0)                                 | 2 (3)                                     | 0 (0)                                     |
| Hypothyroidism               | 6 (2)                                      | 0 (0)                                      | 1 (1)                                 | 0 (0)                                 | 1 (1)                                     | 0 (0)                                     |
| Hyperthyroidism              | 7 (2)                                      | 0 (0)                                      | 4 (3)                                 | 0 (0)                                 | 1 (1)                                     | 0 (0)                                     |
| Autoimmune Hypophysitis      | 1 (0)                                      | 1 (0)                                      | 0 (0)                                 | 0 (0)                                 | 0 (0)                                     | 0 (0)                                     |
| <b>Respiratory/pulmonary</b> | 10 (3)                                     | 3 (1)                                      | 3 (2)                                 | 0 (0)                                 | 3 (4)                                     | 0 (0)                                     |
| Pneumonitis                  | 6 (2)                                      | 1 (0)                                      | 1 (1)                                 | 0 (0)                                 | 1 (1)                                     | 0 (0)                                     |
| <b>Hematologic</b>           | 11 (3)                                     | 3 (1)                                      | 2 (2)                                 | 0 (0)                                 | 1 (1)                                     | 0 (0)                                     |
| Anemia                       | 9 (2)                                      | 3 (1)                                      | 2 (2)                                 | 0 (0)                                 | 1 (1)                                     | 0 (0)                                     |
| <b>Hepatic/pancreatic</b>    | 9 (2)                                      | 0 (0)                                      | 3 (2)                                 | 0 (0)                                 | 2 (3)                                     | 0 (0)                                     |
| Increased transaminase       | 5 (1)                                      |                                            | 2 (2)                                 |                                       | 2 (3)                                     |                                           |

<https://doi.org/10.1371/journal.pone.0199642.t003>

Efficacy outcomes were consistent with previously published findings from selected population of CheckMate 025. The ORR was 26% in CheckMate 025 trial, 23% in EAP, 27% in EAP ≥70 years and 28% in EAP ≥75 years patients. In addition, disease control in the elderly population was 58% in over 70 years and 60% in over 75 years, compared to a disease control of 59% of CheckMate 025 population.

The tolerability profile in the two subgroups has been shown to be consistent with that of the general population. Effectiveness has also been consistent with that of the general population of EAP and also in CheckMate 025. Although, data extracted from the extended access program are retrospective, the results obtained suggest that elderly patients may benefit from nivolumab as second or subsequent line of treatment.

The landscape for managing advanced RCC is rapidly changing, with a range of drugs now approved for the treatment of this disease. Expanded-access trials are a practical way to offer a

Table 4. Summary of discontinuations in all patients, elderly and very elderly.

| Discontinuations                  | Patients, n (%)<br>N = 389 | Elderly Patients, n (%)<br>N = 125 | Patients, n (%)<br>N = 70 |
|-----------------------------------|----------------------------|------------------------------------|---------------------------|
| <b>Discontinued treatment</b>     | 279 (72)                   | 87 (70)                            | 50 (71)                   |
| <b>Reason for discontinuation</b> |                            |                                    |                           |
| PD                                | 213 (76)                   | 65 (75)                            | 37 (74)                   |
| Death                             | 21 (8)                     | 5 (6)                              | 2 (4)                     |
| AEs/serious AEs                   | 22 (8)                     | 7 (8)                              | 6 (12)                    |
| Other                             | 23 (8)                     | 10 (11)                            | 5 (10)                    |

<https://doi.org/10.1371/journal.pone.0199642.t004>



new agent not yet approved/commercially available to unselected patient population, to trial-ineligible patients in a real-world setting.

Nowadays, no analysis has specifically investigated the clinical outcomes and safety profile of nivolumab in the elderly metastatic RCC patients.

Our report has considerably extended the knowledge of the efficacy and tolerability of nivolumab in unselected real-world setting and in particular in elderly.

## Supporting information

**S1 Text. RCC elderly.**

(PDF)

## Acknowledgments

We thank Diana Giannarelli for statistical analysis and all those who contributed to the EAP:

De Giorgi, Istituto Scientifico Romagnolo per lo Studio e la Cura dei Tumori, Meldola; Car-  
teni, AORN A. Cardarelli, Napoli; Falcone AOU Pisana "Spedali Riuniti di S. Chiara, Pisa;  
Basso, Istituto Oncologico Veneto, Padova; Cortesi, Policlinico Umberto I, Roma; Roila, AO  
Santa Maria, Terni; Cascinu, AOU di Modena, Modena; Tirelli, Istituto Nazionale Tumori,  
Aviano; Buti, AOU di Parma; Bracarda, Azienda USL 8, Arezzo; Cognetti, Regina Elena,  
Roma; Sobrero, Ospedale San Martino, Genova; Turci, S. Maria delle Croci, Ravenna; Stern-  
berg, San Camillo Forlanini, Roma; Porta, I.R.C.C.S. San Matteo, Genova; Cappuzzo, USL6 di  
Livorno; Tortora, AOU di Verona, Verona; Tassinari, Ospedale Infermi, Rimini; Passalacqua,  
Istituti Ospitalieri, Cremona; Pazzola, Ospedale Civile SS Annunziata, Sassari; Surico, Ospe-  
dale Vito Fazzi, Lecce; Maio, Policlinico Le Scotte, Siena; Latini, Ospedale di Macerata, Macer-  
ata; Barone, Policlinico Gemelli, Roma; Adamo, Ospedale Papardo di Messina, Messina;  
Ricevuto, Ospedale S.Salvatore, L'Aquila; De Censi, Ospedali Galliera, Genova; Tonini, Cam-  
pus Biomedico, Roma; Pinto, Ospedale S. Maria Nuova, Reggio Emilia; Scotti, AOU Careggi,  
Firenze; Mitterer, Ospedale di Merano, Merano; Castiglione, Ospedale S. Lazzaro, Cuneo;  
Bidoli, Ospedale San Gerardo, Monza; Ferrà, Ospedale S.Vincenzo, Taormina; Crinò, AO di  
Perugia, Perugia; Frassoldati, Arcispedale S. Anna, Ferrara; Marchetti, Ospedale Sant'Andrea,  
Roma; Mini, AOU Careggi, Firenze; Scoppola, Istituto Scientifico Romagnolo per lo Studio e  
la Cura dei Tumori, Roma; Verusio, PO di Saronno, Saronno; Favaretto, Ospedale Ca'Fon-  
cello, Treviso; Di Costanzo, AOU Careggi, Firenze; Fasola, Santa Maria della Misericordia,  
Udine; Merlano, AO S. Croce e Carle di Cuneo, Cuneo; Artioli, Ospedale di Carpi, Carpi; Di  
Leo, Nuovo Ospedale di Prato—Santo Stefano, Prato; Romito, Ospedali riuniti di Foggia; Mae-  
stri, S.Maria della Scaletta, Imola; Giannitto, Ospedale Gravine e Santo Stefano, Caltagirone;  
Ionta, Policlinico Universitario di Cagliari, Cagliari; Verderame, Azienda Ospedaliera "Villa  
Sofia—Cervello", Palermo; Zampa, Presidio Nuovo Regina Margherita, Roma; Numico, AO  
Ss. Antonio e Biagio e Cesare Arrigo, Alessandria; Minelli, Ospedale San Giovanni Addolorata,  
Roma; Tagliaferri, Policlinico Mater Domini Germaneto, Catanzaro; Foa, AO San Paolo,  
Milano; Palmiotti, Ospedale di Venere, Bari; De Placido, AOU Federico II, Napoli; Mattioli,  
Ospedali Riuniti Marche, Fano; Iuliano, Ospedale Pugliese Ciaccio, Rossano; Defraia, AO  
Armando Businco, Cagliari; Siena, Ospedale Niguarda ca' Granda, Milano; Clerico, Ospedale  
degli Infermi, Biella; Salvagno, Ospedale Civile, Treviso; Ceresoli, Humanitas Gavezzeni, Ber-  
gamo; Bernardo, Fondazione Maugeri, Pavia; Di Lieto, Azienda USL 3 di Pistoia, Pistoia;  
Moroni, San Carlo Borromeo, Milano; Maisano, Ospedale Bianchi- Melacrino-Morelli, Reggio  
Calabria; Scartozzi, Policlinico universitario Cagliari, Cagliari; Scagliotti, Ospedale San Luigi,  
Orbassano; Sorarù, ULSS 15 Alta-Padovana, Padova; Pepe, San Giovanni di Dio e Ruggi

d'Aragona, Salerno; Scaltriti, Ospedale di Guastalla, Reggio Emilia; Gebbia, La Maddalena, Palermo; Testa, Ospedale di Urbino, Urbino; Lorusso, Istituto Tumori "GP II", Bari; Bordonaro, AO Garibaldi-Nesima, Catania; De Signoribus, Ospedale Civile S Benedetto del Tronto, Ascoli Piceno; Tedde/Sini, P.O. di Olbia, Olbia; Santoro, Istituto Clinico Humanitas Milano, Milano; Francini, Policlinico Le Scotte, Siena; Aondio, Ospedale Moriggia-Pelascini, Gravedona.

## Author Contributions

**Writing – original draft:** Maria Giuseppa Vitale, Sarah Scagliarini, Luca Galli, Sandro Pignata, Giovanni Lo Re, Alfredo Berruti, Carlotta Defferrari, Massimiliano Spada, Cristina Masini, Daniele Santini, Libero Ciuffreda, Enzo Maria Ruggeri, Carmelo Bengala, Lorenzo Livi, Daniele Fagnani, Andrea Bonetti, Lucio Giustini, Alketa Hamzaj, Giuseppe Procopio, Claudia Caserta, Roberto Sabbatini.

**Writing – review & editing:** Maria Giuseppa Vitale, Sarah Scagliarini, Luca Galli, Sandro Pignata, Giovanni Lo Re, Alfredo Berruti, Carlotta Defferrari, Massimiliano Spada, Cristina Masini, Daniele Santini, Libero Ciuffreda, Enzo Maria Ruggeri, Carmelo Bengala, Lorenzo Livi, Daniele Fagnani, Andrea Bonetti, Lucio Giustini, Alketa Hamzaj, Giuseppe Procopio, Claudia Caserta, Roberto Sabbatini.

## References

1. Quivy A, Daste A, Harbaoui A, Duc S, Bernhard JC, Gross-Goupil M, et al. Optimal management of renal cell carcinoma in the elderly: a review. *Clin Interv Aging*. 2013; 8: 433–42. <https://doi.org/10.2147/CIA.S30765> PMID: 23626463
2. Ramos-Barcelo E, Rioja J, Pes PL, de la Rosette JJ, de Reijke TM. Is age a prognostic factor for treatment outcome in renal cell cancer—A comprehensive review. *Critical Reviews in Oncology/Hematology*. 2009; 72: 83–89. <https://doi.org/10.1016/j.critrevonc.2009.02.005> PMID: 19328009
3. Edwards BK, Brown ML, Wingo PA, Howe HL, Ward E, Ries LA. Annual report to the nation on the status of cancer, 1972–2002, featuring population based trends in cancer treatment. *J Natl Cancer Inst*. 2005; 97: 1407–27. <https://doi.org/10.1093/jnci/dji289> PMID: 16204691
4. Hamid O, Carvajal RD. Anti-programmed death-1 and anti-programmed death-ligand 1 antibodies in cancer therapy. *Expert Opin Biol Ther*. 2013; 13: 847–861. <https://doi.org/10.1517/14712598.2013.770836> PMID: 23421934
5. Nurieva RI, Liu X, Dong C. Molecular mechanisms of T-cell tolerance. *Immunol Rev*. 2011; 241: 133–144. <https://doi.org/10.1111/j.1600-065X.2011.01012.x> PMID: 21488895
6. Motzer RJ, Escudier B, McDermott DF, George S, Hammers HJ, Srinivas S et al. Nivolumab versus everolimus in advanced renal-cell carcinoma. *N Engl J Med*. 2015; 373: 1803–1813. <https://doi.org/10.1056/NEJMoa1510665> PMID: 26406148
7. De Giorgi U, Scagliarini S, Basso U, Galli L, Mosillo C, Caserta C et al. Safety and Efficacy of Nivolumab for Metastatic Renal Cell Carcinoma: Real-World Data From an Italian Expanded Access Program. *Journal of Clinical Oncology*. 2017 35:15: 4577–4577.
8. Coppin C, Porzolt F, Awa A, Kumpf J, Coldman A, Wilt T. Immunotherapy for advanced renal cell cancer. *Cochrane Database Syst Rev*. 2005; 25;1: CD001425.
9. Choueri TK, Escudier B, Powles T, Tannir NM, Mainwaring PN, Rini BI et al. Cabozantinib versus Everolimus in advanced renal cell carcinoma (METEOR): final results from a randomized, open-label, phase 3 trial. *Lancet Oncol*. 2016; 17: 917–27. [https://doi.org/10.1016/S1470-2045\(16\)30107-3](https://doi.org/10.1016/S1470-2045(16)30107-3) PMID: 27279544
