# Supplementary material for: Efficacy and safety data in elderly patients with metastatic renal cell carcinoma included in the nivolumab Expanded Access Program (EAP) in Italy
Source: PubMed Central journal article supplement (PMC6034807; doi:10.1371/journal.pone.0199642), 2018-07-06
Supplement: pone.0199642.s001.pdf [file pone.0199642.s001.pdf]

| Site   | CODE | non_CC | Age   | previous_line | Nivo_doses | Best_resp | age_70 | bone_met | brain_met | age_75 | sex  | PFS   | PROG  | OS    | STATUS |
|--------|------|--------|-------|---------------|------------|-----------|--------|----------|-----------|--------|------|-------|-------|-------|--------|
| 79.00  | 1    | 0.00   | 71.00 | 2.00          | 7.00       | pd        | 2.00   | 0.00     | 0.00      | 1.00   | 1.00 | 2.10  | yes   | 7.80  | died   |
| 79.00  | 2    | 0.00   | 75.00 | 3.00          | 26.00      | pr        | 2.00   | 0.00     | 0.00      | 2.00   | 1.00 | 15.20 | no    | 15.20 | alive  |
| 79.00  | 3    | 0.00   | 79.00 | 3.00          | 30.00      | pr        | 2.00   | 1.00     | 0.00      | 2.00   | 1.00 | 17.90 | no    | 17.90 | alive  |
| 79.00  | 4    | 0.00   | 77.00 | 3.00          | 5.00       | na        | 2.00   | 1.00     | 0.00      | 2.00   | 1.00 | 18.60 | death | 18.60 | died   |
| 115.00 | 5    | 0.00   | 75.00 | 5.00          | 20.00      | sd        | 2.00   | 0.00     | 0.00      | 2.00   | 1.00 | 8.30  | yes   | 11.20 | died   |
| 122.00 | 6    | 0.00   | 70.00 | 2.00          | 6.00       | sd        | 2.00   | 1.00     | 0.00      | 1.00   | 1.00 | 7.80  | death | 7.80  | died   |
| 135.00 | 7    | 0.00   | 75.00 | 2.00          | 7.00       | sd        | 2.00   | 0.00     | 0.00      | 2.00   | 1.00 | 3.30  | yes   | 7.70  | died   |
| 135.00 | 8    | 0.00   | 80.00 | 1.00          | 18.00      | pr        | 2.00   | 1.00     | 0.00      | 2.00   | 1.00 | 13.60 | yes   | 15.20 | alive  |
| 135.00 | 9    | 0.00   | 72.00 | 1.00          | 4.00       | pd        | 2.00   | 0.00     | 0.00      | 1.00   | 1.00 | 1.30  | yes   | 6.00  | died   |
| 166.00 | 10   | 0.00   | 84.00 | 3.00          | 1.00       | death     | 2.00   | 1.00     | 0.00      | 2.00   | 2.00 | 0.10  | death | 0.10  | died   |
| 166.00 | 11   | 0.00   | 80.00 | 1.00          | 21.00      | pr        | 2.00   | 0.00     | 0.00      | 2.00   | 1.00 | 10.60 | no    | 10.60 | alive  |
| 228.00 | 12   | 1.00   | 81.00 | 2.00          | 11.00      | pd        | 2.00   | 0.00     | 0.00      | 2.00   | 2.00 | 3.40  | yes   | 11.30 | alive  |
| 228.00 | 13   | 0.00   | 75.00 | 2.00          | 1.00       | pd        | 2.00   | 0.00     | 0.00      | 2.00   | 2.00 | 0.90  | yes   | 0.90  | lost   |
| 228.00 | 14   | 0.00   | 75.00 | 1.00          | 2.00       | na        | 2.00   | 0.00     | 0.00      | 2.00   | 1.00 | 0.90  | na    | 0.90  | lost   |
| 228.00 | 15   | 0.00   | 72.00 | 2.00          | 34.00      | pr        | 2.00   | 0.00     | 0.00      | 1.00   | 2.00 | 16.20 | no    | 16.20 | alive  |
| 228.00 | 16   | 0.00   | 79.00 | 2.00          | 4.00       | pd        | 2.00   | 1.00     | 0.00      | 2.00   | 1.00 | 2.10  | yes   | 2.20  | lost   |
| 228.00 | 17   | 0.00   | 74.00 | 3.00          | 35.00      | pr        | 2.00   | 0.00     | 0.00      | 1.00   | 2.00 | 16.10 | no    | 16.10 | alive  |
| 235.00 | 18   | 0.00   | 78.00 | 2.00          | 10.00      | pd        | 2.00   | 1.00     | 0.00      | 2.00   | 1.00 | 2.20  | yes   | 17.40 | alive  |
| 248.00 | 19   | 0.00   | 74.00 | 2.00          | 6.00       | pd        | 2.00   | 1.00     | 0.00      | 1.00   | 2.00 | 3.40  | yes   | 11.30 | alive  |
| 248.00 | 20   | 0.00   | 77.00 | 2.00          | 16.00      | sd        | 2.00   | 1.00     | 0.00      | 2.00   | 1.00 | 3.60  | yes   | 8.60  | alive  |
| 248.00 | 21   | 0.00   | 74.00 | 3.00          | 27.00      | sd        | 2.00   | 0.00     | 0.00      | 1.00   | 2.00 | 6.40  | yes   | 20.90 | alive  |
| 248.00 | 22   | 1.00   | 70.00 | 3.00          | 10.00      | pd        | 2.00   | 0.00     | 0.00      | 1.00   | 1.00 | 3.80  | yes   | 12.20 | alive  |
| 248.00 | 23   | 0.00   | 75.00 | 1.00          | 25.00      | pr        | 2.00   | 0.00     | 0.00      | 2.00   | 1.00 | 6.40  | yes   | 19.00 | alive  |
| 248.00 | 24   | 0.00   | 72.00 | 3.00          | 13.00      | pd        | 2.00   | 0.00     | 1.00      | 1.00   | 1.00 | 3.70  | yes   | 20.40 | alive  |
| 248.00 | 25   | 1.00   | 75.00 | 1.00          | 6.00       | pd        | 2.00   | 1.00     | 0.00      | 2.00   | 2.00 | 2.90  | yes   | 14.00 | alive  |
| 292.00 | 26   | 0.00   | 85.00 | 5.00          | 10.00      | pd        | 2.00   | 0.00     | 0.00      | 2.00   | 1.00 | 5.10  | yes   | 6.30  | alive  |
| 305.00 | 27   | 0.00   | 71.00 | 4.00          | 29.00      | sd        | 2.00   | 0.00     | 0.00      | 1.00   | 1.00 | 13.80 | yes   | 17.60 | died   |
| 315.00 | 28   | 0.00   | 75.00 | 2.00          | 8.00       | pd        | 2.00   | 0.00     | 0.00      | 2.00   | 2.00 | 2.30  | yes   | 5.30  | died   |
| 315.00 | 29   | 0.00   | 78.00 | 2.00          | 10.00      | pd        | 2.00   | 0.00     | 0.00      | 2.00   | 1.00 | 2.00  | yes   | 21.00 | alive  |
| 315.00 | 30   | 0.00   | 72.00 | 2.00          | 13.00      | sd        | 2.00   | 1.00     | 0.00      | 1.00   | 2.00 | 2.00  | yes   | 9.30  | alive  |
| 321.00 | 31   | 0.00   | 72.00 | 3.00          | 17.00      | pd        | 2.00   | 1.00     | 0.00      | 1.00   | 2.00 | 0.50  | yes   | 9.20  | alive  |
| 324.00 | 32   | 0.00   | 74.00 | 3.00          | 8.00       | pd        | 2.00   | 1.00     | 0.00      | 1.00   | 1.00 | 2.90  | yes   | 13.30 | died   |

|        |    |      |       |         |         |       |      |      |      |      |      |       |       |       |       |
|--------|----|------|-------|---------|---------|-------|------|------|------|------|------|-------|-------|-------|-------|
| 336.00 | 33 | 0.00 | 73.00 | 2.00    | 8.00    | pd    | 2.00 | 0.00 | 0.00 | 1.00 | 2.00 | 3.10  | yes   | 8.50  | died  |
| 336.00 | 34 | 0.00 | 75.00 | 1.00    | 34.00   | pr    | 2.00 | 1.00 | 0.00 | 2.00 | 1.00 | 17.80 | no    | 17.80 | alive |
| 336.00 | 35 | 0.00 | 75.00 | 4.00    | 4.00    | pd    | 2.00 | 0.00 | 0.00 | 2.00 | 1.00 | 1.70  | yes   | 15.90 | died  |
| 339.00 | 36 | 0.00 | 77.00 | 3.00    | 30.00   | sd    | 2.00 | 0.00 | 0.00 | 2.00 | 1.00 | 4.90  | yes   | 16.00 | alive |
| 339.00 | 37 | 0.00 | 70.00 | 5.00    | 19.00   | sd    | 2.00 | 1.00 | 0.00 | 1.00 | 1.00 | 8.50  | yes   | 15.20 | alive |
| 339.00 | 38 | 0.00 | 77.00 | 2.00    | #NULLO! | sd    | 2.00 | 0.00 | 0.00 | 2.00 | 1.00 | 4.10  | yes   | 6.50  | lost  |
| 339.00 | 39 | 0.00 | 72.00 | 2.00    | 4.00    | pd    | 2.00 | 1.00 | 0.00 | 1.00 | 1.00 | 2.60  | yes   | 2.80  | lost  |
| 350.00 | 40 | 0.00 | 81.00 | #NULLO! | 4.00    | death | 2.00 | 0.00 | 0.00 | 2.00 | 1.00 | 5.00  | death | 5.00  | died  |
| 350.00 | 41 | 0.00 | 74.00 | 4.00    | 10.00   | sd    | 2.00 | 0.00 | 0.00 | 1.00 | 1.00 | 9.60  | death | 9.60  | died  |
| 350.00 | 42 | 0.00 | 70.00 | 3.00    | 26.00   | sd    | 2.00 | 1.00 | 0.00 | 1.00 | 1.00 | 13.20 | no    | 13.20 | alive |
| 379.00 | 43 | 0.00 | 75.00 | 4.00    | 34.00   | sd    | 2.00 | 0.00 | 0.00 | 2.00 | 1.00 | 7.90  | yes   | 22.20 | alive |
| 379.00 | 44 | 0.00 | 73.00 | 2.00    | 16.00   | death | 2.00 | 0.00 | 0.00 | 1.00 | 1.00 | 9.40  | death | 9.40  | died  |
| 379.00 | 45 | 0.00 | 78.00 | 5.00    | 39.00   | pr    | 2.00 | 0.00 | 0.00 | 2.00 | 1.00 | 19.80 | no    | 19.80 | alive |
| 379.00 | 46 | 0.00 | 71.00 | 2.00    | 32.00   | pd    | 2.00 | 1.00 | 0.00 | 1.00 | 1.00 | 5.90  | yes   | 16.90 | alive |
| 379.00 | 47 | 0.00 | 77.00 | 2.00    | 3.00    | pd    | 2.00 | 0.00 | 0.00 | 2.00 | 1.00 | 0.90  | yes   | 2.00  | died  |
| 401.00 | 48 | 1.00 | 83.00 | 3.00    | 10.00   | sd    | 2.00 | 0.00 | 0.00 | 2.00 | 1.00 | 5.90  | yes   | 15.20 | alive |
| 401.00 | 49 | 0.00 | 71.00 | 3.00    | 12.00   | sd    | 2.00 | 0.00 | 0.00 | 1.00 | 1.00 | 5.50  | yes   | 8.90  | died  |
| 426.00 | 50 | 0.00 | 73.00 | 3.00    | 27.00   | sd    | 2.00 | 1.00 | 0.00 | 1.00 | 1.00 | 15.40 | no    | 15.40 | alive |
| 426.00 | 51 | 0.00 | 72.00 | 4.00    | 1.00    | pd    | 2.00 | 1.00 | 0.00 | 1.00 | 2.00 | 0.00  | yes   | 0.00  | lost  |
| 426.00 | 52 | 0.00 | 75.00 | 2.00    | 13.00   | sd    | 2.00 | 1.00 | 0.00 | 2.00 | 1.00 | 5.60  | yes   | 14.00 | alive |
| 426.00 | 53 | 0.00 | 72.00 | 5.00    | 26.00   | sd    | 2.00 | 0.00 | 0.00 | 1.00 | 2.00 | 12.70 | no    | 12.70 | alive |
| 475.00 | 54 | 0.00 | 75.00 | 2.00    | 33.00   | pr    | 2.00 | 1.00 | 0.00 | 2.00 | 2.00 | 15.90 | NO    | 15.90 | alive |
| 534.00 | 55 | 0.00 | 71.00 | 3.00    | 24.00   | pr    | 2.00 | 0.00 | 0.00 | 1.00 | 1.00 | 17.30 | no    | 17.30 | alive |
| 535.00 | 56 | 0.00 | 76.00 | 1.00    | 14.00   | pr    | 2.00 | 0.00 | 0.00 | 2.00 | 1.00 | 8.50  | no    | 8.50  | alive |
| 568.00 | 57 | 0.00 | 74.00 | 4.00    | 33.00   | pr    | 2.00 | 0.00 | 0.00 | 1.00 | 1.00 | 7.20  | yes   | 20.30 | alive |
| 568.00 | 58 | 0.00 | 81.00 | 2.00    | 33.00   | sd    | 2.00 | 0.00 | 0.00 | 2.00 | 2.00 | 3.70  | yes   | 17.40 | alive |
| 569.00 | 59 | 0.00 | 82.00 | 1.00    | 15.00   | sd    | 2.00 | 1.00 | 0.00 | 2.00 | 2.00 | 6.50  | yes   | 14.10 | alive |
| 569.00 | 60 | 2.00 | 84.00 | 1.00    | 24.00   | pr    | 2.00 | 1.00 | 0.00 | 2.00 | 2.00 | 12.40 | no    | 12.40 | alive |
| 569.00 | 61 | 0.00 | 74.00 | 2.00    | 9.00    | sd    | 2.00 | 0.00 | 0.00 | 1.00 | 1.00 | 7.50  | yes   | 14.60 | alive |
| 569.00 | 62 | 0.00 | 81.00 | 1.00    | 27.00   | pr    | 2.00 | 0.00 | 0.00 | 2.00 | 1.00 | 14.00 | no    | 14.00 | alive |
| 601.00 | 63 | 0.00 | 73.00 | 1.00    | 12.00   | sd    | 2.00 | 0.00 | 0.00 | 1.00 | 1.00 | 7.30  | yes   | 9.30  | died  |
| 611.00 | 64 | 0.00 | 70.00 | 3.00    | 7.00    | pd    | 2.00 | 1.00 | 0.00 | 1.00 | 1.00 | 3.30  | yes   | 12.20 | alive |
| 611.00 | 65 | 0.00 | 71.00 | 2.00    | 15.00   | pr    | 2.00 | 1.00 | 0.00 | 1.00 | 1.00 | 7.30  | yes   | 10.10 | alive |

|         |    |      |       |      |       |    |      |      |      |      |      |       |     |       |       |
|---------|----|------|-------|------|-------|----|------|------|------|------|------|-------|-----|-------|-------|
| 615.00  | 66 | 0.00 | 76.00 | 4.00 | 16.00 | sd | 2.00 | 1.00 | 0.00 | 2.00 | 1.00 | 12.30 | no  | 12.30 | alive |
| 615.00  | 67 | 0.00 | 81.00 | 1.00 | 2.00  | na | 2.00 | 0.00 | 0.00 | 2.00 | 1.00 | 6.10  | no  | 6.10  | lost  |
| 615.00  | 68 | 0.00 | 72.00 | 4.00 | 17.00 | sd | 2.00 | 1.00 | 0.00 | 1.00 | 1.00 | 8.40  | no  | 8.40  | alive |
| 615.00  | 69 | 0.00 | 77.00 | 1.00 | 3.00  | pd | 2.00 | 0.00 | 0.00 | 2.00 | 1.00 | 3.20  | yes | 8.40  | died  |
| 632.00  | 70 | 0.00 | 75.00 | 3.00 | 13.00 | sd | 2.00 | 0.00 | 0.00 | 2.00 | 1.00 | 10.80 | no  | 10.80 | alive |
| 646.00  | 71 | 0.00 | 72.00 | 3.00 | 22.00 | pr | 2.00 | 0.00 | 0.00 | 1.00 | 1.00 | 14.00 | yes | 16.80 | died  |
| 646.00  | 72 | 0.00 | 81.00 | 4.00 | 11.00 | pd | 2.00 | 0.00 | 0.00 | 2.00 | 1.00 | 2.80  | yes | 12.70 | died  |
| 712.00  | 73 | 2.00 | 77.00 | 2.00 | 1.00  | pd | 2.00 | 1.00 | 0.00 | 2.00 | 2.00 | 0.50  | yes | 0.90  | died  |
| 712.00  | 74 | 0.00 | 73.00 | 4.00 | 10.00 | sd | 2.00 | 1.00 | 0.00 | 1.00 | 1.00 | 6.30  | yes | 10.30 | died  |
| 712.00  | 75 | 0.00 | 70.00 | 1.00 | 23.00 | pd | 2.00 | 1.00 | 0.00 | 1.00 | 1.00 | 2.50  | yes | 14.70 | alive |
| 731.00  | 76 | 0.00 | 75.00 | 1.00 | 2.00  | pd | 2.00 | 0.00 | 0.00 | 2.00 | 1.00 | 0.50  | yes | 1.50  | died  |
| 736.00  | 77 | 0.00 | 78.00 | 2.00 | 30.00 | sd | 2.00 | 0.00 | 0.00 | 2.00 | 2.00 | 1.60  | yes | 23.60 | alive |
| 736.00  | 78 | 0.00 | 76.00 | 2.00 | 12.00 | sd | 2.00 | 0.00 | 0.00 | 2.00 | 2.00 | 4.40  | yes | 18.70 | alive |
| 736.00  | 79 | 0.00 | 77.00 | 1.00 | 29.00 | sd | 2.00 | 1.00 | 0.00 | 2.00 | 1.00 | 2.20  | yes | 18.50 | alive |
| 770.00  | 80 | 0.00 | 70.00 | 1.00 | 7.00  | pr | 2.00 | 0.00 | 0.00 | 1.00 | 1.00 | 6.90  | no  | 6.90  | alive |
| 773.00  | 81 | 0.00 | 81.00 | 2.00 | 6.00  | pd | 2.00 | 0.00 | 0.00 | 2.00 | 2.00 | 2.10  | yes | 3.30  | died  |
| 796.00  | 82 | 0.00 | 80.00 | 4.00 | 16.00 | pr | 2.00 | 1.00 | 0.00 | 2.00 | 1.00 | 8.10  | yes | 11.00 | alive |
| 809.00  | 83 | 0.00 | 71.00 | 5.00 | 5.00  | sd | 2.00 | 1.00 | 0.00 | 1.00 | 1.00 | 2.10  | yes | 5.30  | alive |
| 821.00  | 84 | 0.00 | 75.00 | 3.00 | 18.00 | sd | 2.00 | 0.00 | 0.00 | 2.00 | 2.00 | 9.20  | yes | 17.30 | alive |
| 841.00  | 85 | 0.00 | 75.00 | 7.00 | 19.00 | sd | 2.00 | 0.00 | 0.00 | 2.00 | 2.00 | 12.20 | yes | 14.90 | alive |
| 917.00  | 86 | 0.00 | 70.00 | 1.00 | 7.00  | pd | 2.00 | 0.00 | 0.00 | 1.00 | 1.00 | 2.60  | yes | 6.20  | died  |
| 917.00  | 87 | 0.00 | 73.00 | 3.00 | 24.00 | pr | 2.00 | 0.00 | 0.00 | 1.00 | 2.00 | 11.60 | yes | 12.90 | died  |
| 940.00  | 88 | 0.00 | 77.00 | 1.00 | 20.00 | sd | 2.00 | 1.00 | 1.00 | 2.00 | 1.00 | 10.30 | yes | 11.00 | alive |
| 947.00  | 89 | 0.00 | 77.00 | 2.00 | 31.00 | cr | 2.00 | 0.00 | 0.00 | 2.00 | 2.00 | 18.10 | no  | 18.10 | alive |
| 1011.00 | 90 | 0.00 | 70.00 | 2.00 | 5.00  | pd | 2.00 | 0.00 | 0.00 | 1.00 | 1.00 | 2.70  | yes | 7.20  | alive |
| 1018.00 | 91 | 0.00 | 76.00 | 1.00 | 9.00  | pr | 2.00 | 0.00 | 0.00 | 2.00 | 1.00 | 14.40 | no  | 14.40 | alive |
| 1018.00 | 92 | 0.00 | 79.00 | 2.00 | 17.00 | pr | 2.00 | 0.00 | 0.00 | 2.00 | 1.00 | 7.60  | yes | 12.90 | died  |
| 1018.00 | 93 | 0.00 | 76.00 | 1.00 | 32.00 | sd | 2.00 | 0.00 | 0.00 | 2.00 | 1.00 | 14.40 | no  | 14.40 | alive |
| 1018.00 | 94 | 0.00 | 73.00 | 1.00 | 3.00  | pd | 2.00 | 0.00 | 0.00 | 1.00 | 1.00 | 1.50  | yes | 5.60  | died  |
| 1021.00 | 95 | 0.00 | 76.00 | 3.00 | 11.00 | pd | 2.00 | 0.00 | 0.00 | 2.00 | 1.00 | 5.90  | yes | 12.80 | died  |
| 1047.00 | 96 | 0.00 | 77.00 | 2.00 | 9.00  | sd | 2.00 | 1.00 | 0.00 | 2.00 | 2.00 | 4.30  | yes | 22.90 | alive |
| 1047.00 | 97 | 0.00 | 78.00 | 5.00 | 30.00 | pr | 2.00 | 0.00 | 0.00 | 2.00 | 1.00 | 14.60 | yes | 14.60 | alive |
| 1047.00 | 98 | 0.00 | 70.00 | 2.00 | 38.00 | pr | 2.00 | 0.00 | 0.00 | 1.00 | 1.00 | 19.10 | n   | 19.10 | alive |

|         |     |      |       |      |       |       |      |      |      |      |      |       |       |       |       |
|---------|-----|------|-------|------|-------|-------|------|------|------|------|------|-------|-------|-------|-------|
| 1047.00 | 99  | 0.00 | 80.00 | 1.00 | 38.00 | pr    | 2.00 | 0.00 | 0.00 | 2.00 | 1.00 | 19.30 | n     | 19.30 | alive |
| 1047.00 | 100 | 0.00 | 70.00 | 2.00 | 5.00  | pd    | 2.00 | 1.00 | 0.00 | 1.00 | 1.00 | 3.50  | yes   | 4.20  | died  |
| 1047.00 | 101 | 0.00 | 76.00 | 3.00 | 1.00  | pr    | 2.00 | 0.00 | 0.00 | 2.00 | 1.00 | 2.80  | yes   | 17.50 | alive |
| 1047.00 | 102 | 0.00 | 72.00 | 1.00 | 36.00 | sd    | 2.00 | 0.00 | 0.00 | 1.00 | 2.00 | 19.40 | no    | 19.40 | alive |
| 1047.00 | 103 | 0.00 | 72.00 | 2.00 | 22.00 | pd    | 2.00 | 0.00 | 0.00 | 1.00 | 2.00 | 2.50  | yes   | 18.30 | alive |
| 1047.00 | 104 | 0.00 | 77.00 | 3.00 | 10.00 | sd    | 2.00 | 0.00 | 0.00 | 2.00 | 1.00 | 5.10  | yes   | 11.00 | died  |
| 1106.00 | 105 | 0.00 | 74.00 | 1.00 | 29.00 | sd    | 2.00 | 0.00 | 0.00 | 1.00 | 1.00 | 17.50 | yes   | 18.30 | alive |
| 1268.00 | 106 | 0.00 | 70.00 | 3.00 | 43.00 | pr    | 2.00 | 1.00 | 0.00 | 1.00 | 1.00 | 0.90  | yes   | 21.60 | alive |
| 1268.00 | 107 | 0.00 | 83.00 | 2.00 | 8.00  | sd    | 2.00 | 1.00 | 0.00 | 2.00 | 1.00 | 2.90  | yes   | 20.80 | died  |
| 1268.00 | 108 | 0.00 | 77.00 | 2.00 | 43.00 | pr    | 2.00 | 1.00 | 0.00 | 2.00 | 1.00 | 2.80  | yes   | 20.90 | alive |
| 1268.00 | 109 | 0.00 | 70.00 | 1.00 | 33.00 | sd    | 2.00 | 1.00 | 0.00 | 1.00 | 1.00 | 3.20  | yes   | 18.70 | alive |
| 1268.00 | 110 | 1.00 | 71.00 | 3.00 | 4.00  | pd    | 2.00 | 0.00 | 1.00 | 1.00 | 1.00 | 3.00  | yes   | 4.90  | lost  |
| 1268.00 | 111 | 0.00 | 78.00 | 2.00 | 3.00  | death | 2.00 | 1.00 | 0.00 | 2.00 | 1.00 | 5.70  | death | 5.70  | died  |
| 1268.00 | 112 | 0.00 | 74.00 | 1.00 | 40.00 | pr    | 2.00 | 1.00 | 0.00 | 1.00 | 1.00 | 19.40 | no    | 19.40 | alive |
| 1268.00 | 113 | 0.00 | 75.00 | 1.00 | 34.00 | sd    | 2.00 | 0.00 | 0.00 | 2.00 | 2.00 | 20.10 | no    | 20.10 | alive |
| 1268.00 | 114 | 0.00 | 70.00 | 1.00 | 23.00 | sd    | 2.00 | 0.00 | 0.00 | 1.00 | 1.00 | 7.40  | yes   | 19.40 | alive |
| 1269.00 | 115 | 0.00 | 75.00 | 2.00 | 8.00  | sd    | 2.00 | 0.00 | 0.00 | 2.00 | 1.00 | 3.70  | yes   | 11.70 | ALIVE |
| 1269.00 | 116 | 0.00 | 77.00 | 1.00 | 11.00 | pd    | 2.00 | 1.00 | 0.00 | 2.00 | 1.00 | 3.10  | yes   | 5.70  | died  |
| 1269.00 | 117 | 0.00 | 72.00 | 1.00 | 36.00 | sd    | 2.00 | 1.00 | 0.00 | 1.00 | 1.00 | 12.60 | yes   | 19.30 | ALIVE |
| 1269.00 | 118 | 0.00 | 74.00 | 1.00 | 38.00 | pr    | 2.00 | 0.00 | 0.00 | 1.00 | 1.00 | 18.00 | N     | 18.00 | ALIVE |
| 1269.00 | 119 | 0.00 | 75.00 | 2.00 | 3.00  | pd    | 2.00 | 1.00 | 0.00 | 2.00 | 1.00 | 1.30  | yes   | 2.80  | died  |
| 1269.00 | 120 | 0.00 | 77.00 | 1.00 | 35.00 | pr    | 2.00 | 0.00 | 0.00 | 2.00 | 1.00 | 18.40 | N     | 18.40 | ALIVE |
| 1312.00 | 121 | 0.00 | 70.00 | 4.00 | 1.00  | pd    | 2.00 | 0.00 | 0.00 | 1.00 | 1.00 | 0.00  | yes   | 1.50  | died  |
| 1320.00 | 122 | 0.00 | 75.00 | 4.00 | 14.00 | pr    | 2.00 | 0.00 | 0.00 | 2.00 | 2.00 | 6.90  | yes   | 20.90 | alive |
| 1320.00 | 123 | 0.00 | 70.00 | 3.00 | 2.00  | death | 2.00 | 0.00 | 0.00 | 1.00 | 1.00 | 5.80  | death | 5.80  | died  |
| 1404.00 | 124 | 0.00 | 74.00 | 4.00 | 13.00 | pr    | 2.00 | 0.00 | 0.00 | 1.00 | 1.00 | 7.10  | yes   | 8.50  | died  |
| 1502.00 | 125 | 1.00 | 75.00 | 4.00 | 3.00  | pd    | 2.00 | 1.00 | 0.00 | 2.00 | 1.00 | 0.40  | yes   | 2.50  | died  |

| toxicity_0_2_4 | related_0_2_4 | liver_met | lung_met | node_met | ecogps  | G4   | ORR  | DCR  |
|----------------|---------------|-----------|----------|----------|---------|------|------|------|
| 4.00           | 4.00          | 0.00      | 1.00     | 1.00     | 1.00    | 0.00 | 0.00 | 0.00 |
| 2.00           | 2.00          | 0.00      | 0.00     | 1.00     | 1.00    | 0.00 | 1.00 | 1.00 |
| 2.00           | 2.00          | 0.00      | 1.00     | 1.00     | 0.00    | 0.00 | 1.00 | 1.00 |
| 2.00           | 0.00          | 0.00      | 1.00     | 0.00     | 1.00    | 0.00 | 0.00 | 0.00 |
| 0.00           | 0.00          | 1.00      | 1.00     | 0.00     | 1.00    | 0.00 | 0.00 | 1.00 |
| 2.00           | 0.00          | 0.00      | 0.00     | 0.00     | 1.00    | 0.00 | 0.00 | 1.00 |
| 2.00           | 2.00          | 0.00      | 1.00     | 1.00     | 1.00    | 0.00 | 0.00 | 1.00 |
| 0.00           | 0.00          | 0.00      | 0.00     | 1.00     | 0.00    | 0.00 | 1.00 | 1.00 |
| 0.00           | 0.00          | 0.00      | 0.00     | 1.00     | 1.00    | 1.00 | 0.00 | 0.00 |
| 2.00           | 0.00          | 0.00      | 0.00     | 0.00     | 1.00    | 0.00 | 0.00 | 0.00 |
| 0.00           | 2.00          | 1.00      | 0.00     | 0.00     | 1.00    | 0.00 | 1.00 | 1.00 |
| 2.00           | 0.00          | 1.00      | 0.00     | 1.00     | #NULLO! | 0.00 | 0.00 | 0.00 |
| 0.00           | 0.00          | 0.00      | 0.00     | 0.00     | 1.00    | 0.00 | 0.00 | 0.00 |
| 0.00           | 0.00          | 0.00      | 0.00     | 0.00     | 2.00    | 0.00 | 0.00 | 0.00 |
| 2.00           | 0.00          | 0.00      | 1.00     | 1.00     | 0.00    | 0.00 | 1.00 | 1.00 |
| 4.00           | 0.00          | 1.00      | 0.00     | 1.00     | 1.00    | 1.00 | 0.00 | 0.00 |
| 2.00           | 0.00          | 0.00      | 1.00     | 0.00     | 0.00    | 0.00 | 1.00 | 1.00 |
| 2.00           | 2.00          | 0.00      | 1.00     | 0.00     | 0.00    | 0.00 | 0.00 | 0.00 |
| 2.00           | 2.00          | 1.00      | 0.00     | 0.00     | 1.00    | 0.00 | 0.00 | 0.00 |
| 2.00           | 2.00          | 1.00      | 1.00     | 1.00     | 1.00    | 0.00 | 0.00 | 1.00 |
| 4.00           | 0.00          | 0.00      | 1.00     | 1.00     | 1.00    | 0.00 | 0.00 | 1.00 |
| 2.00           | 4.00          | 0.00      | 1.00     | 1.00     | 1.00    | 0.00 | 0.00 | 0.00 |
| 2.00           | 2.00          | 1.00      | 1.00     | 1.00     | 1.00    | 0.00 | 1.00 | 1.00 |
| 2.00           | 2.00          | 0.00      | 1.00     | 0.00     | 0.00    | 0.00 | 0.00 | 0.00 |
| 2.00           | 2.00          | 0.00      | 1.00     | 1.00     | 1.00    | 0.00 | 0.00 | 0.00 |
| 0.00           | 0.00          | 0.00      | 1.00     | 1.00     | 1.00    | 0.00 | 0.00 | 0.00 |
| 4.00           | 0.00          | 1.00      | 1.00     | 0.00     | 1.00    | 0.00 | 0.00 | 1.00 |
| 2.00           | 2.00          | 1.00      | 1.00     | 1.00     | 1.00    | 1.00 | 0.00 | 0.00 |
| 2.00           | 2.00          | 0.00      | 1.00     | 1.00     | 0.00    | 0.00 | 0.00 | 0.00 |
| 2.00           | 2.00          | 0.00      | 1.00     | 1.00     | 1.00    | 0.00 | 0.00 | 1.00 |
| 2.00           | 2.00          | 0.00      | 1.00     | 0.00     | #NULLO! | 0.00 | 0.00 | 0.00 |
| 0.00           | 0.00          | 0.00      | 1.00     | 1.00     | 1.00    | 1.00 | 0.00 | 0.00 |

|      |      |      |      |      |         |      |      |      |
|------|------|------|------|------|---------|------|------|------|
| 0.00 | 0.00 | 1.00 | 1.00 | 1.00 | 0.00    | 1.00 | 0.00 | 0.00 |
| 0.00 | 0.00 | 1.00 | 1.00 | 1.00 | 0.00    | 0.00 | 1.00 | 1.00 |
| 2.00 | 0.00 | 0.00 | 0.00 | 0.00 | 0.00    | 0.00 | 0.00 | 0.00 |
| 2.00 | 2.00 | 0.00 | 1.00 | 1.00 | 0.00    | 0.00 | 0.00 | 1.00 |
| 4.00 | 0.00 | 1.00 | 1.00 | 0.00 | 1.00    | 0.00 | 0.00 | 1.00 |
| 0.00 | 0.00 | 0.00 | 0.00 | 1.00 | 1.00    | 0.00 | 0.00 | 1.00 |
| 0.00 | 0.00 | 1.00 | 1.00 | 1.00 | 1.00    | 0.00 | 0.00 | 0.00 |
| 0.00 | 0.00 | 0.00 | 0.00 | 0.00 | #NULLO! | 0.00 | 0.00 | 0.00 |
| 0.00 | 0.00 | 0.00 | 1.00 | 1.00 | 1.00    | 0.00 | 0.00 | 1.00 |
| 0.00 | 0.00 | 1.00 | 0.00 | 0.00 | 0.00    | 0.00 | 0.00 | 1.00 |
| 4.00 | 4.00 | 1.00 | 1.00 | 0.00 | 1.00    | 0.00 | 0.00 | 1.00 |
| 0.00 | 0.00 | 0.00 | 1.00 | 0.00 | 0.00    | 0.00 | 0.00 | 0.00 |
| 2.00 | 0.00 | 1.00 | 1.00 | 0.00 | 1.00    | 0.00 | 1.00 | 1.00 |
| 2.00 | 0.00 | 1.00 | 1.00 | 1.00 | 1.00    | 0.00 | 0.00 | 0.00 |
| 2.00 | 0.00 | 0.00 | 1.00 | 0.00 | 2.00    | 0.00 | 0.00 | 0.00 |
| 0.00 | 0.00 | 0.00 | 0.00 | 1.00 | 0.00    | 0.00 | 0.00 | 1.00 |
| 2.00 | 0.00 | 0.00 | 1.00 | 0.00 | 1.00    | 0.00 | 0.00 | 1.00 |
| 0.00 | 0.00 | 0.00 | 0.00 | 0.00 | 1.00    | 0.00 | 0.00 | 1.00 |
| 0.00 | 0.00 | 0.00 | 1.00 | 0.00 | 1.00    | 0.00 | 0.00 | 0.00 |
| 0.00 | 0.00 | 0.00 | 1.00 | 1.00 | 0.00    | 0.00 | 0.00 | 1.00 |
| 0.00 | 0.00 | 0.00 | 1.00 | 1.00 | 1.00    | 0.00 | 0.00 | 1.00 |
| 0.00 | 0.00 | 0.00 | 1.00 | 1.00 | 2.00    | 0.00 | 1.00 | 1.00 |
| 2.00 | 2.00 | 0.00 | 1.00 | 1.00 | 0.00    | 0.00 | 1.00 | 1.00 |
| 0.00 | 0.00 | 0.00 | 1.00 | 1.00 | 0.00    | 0.00 | 1.00 | 1.00 |
| 2.00 | 2.00 | 1.00 | 0.00 | 0.00 | 1.00    | 0.00 | 1.00 | 1.00 |
| 2.00 | 2.00 | 0.00 | 1.00 | 0.00 | 1.00    | 0.00 | 0.00 | 1.00 |
| 2.00 | 2.00 | 0.00 | 1.00 | 0.00 | 1.00    | 0.00 | 1.00 | 1.00 |
| 0.00 | 2.00 | 1.00 | 1.00 | 1.00 | 0.00    | 0.00 | 0.00 | 1.00 |
| 0.00 | 0.00 | 0.00 | 1.00 | 0.00 | 0.00    | 0.00 | 1.00 | 1.00 |
| 2.00 | 0.00 | 0.00 | 1.00 | 1.00 | 0.00    | 0.00 | 0.00 | 1.00 |
| 0.00 | 0.00 | 1.00 | 0.00 | 1.00 | 1.00    | 0.00 | 0.00 | 0.00 |
| 0.00 | 0.00 | 0.00 | 1.00 | 0.00 | 0.00    | 1.00 | 1.00 | 1.00 |

|      |      |      |      |      |         |      |      |      |
|------|------|------|------|------|---------|------|------|------|
| 0.00 | 0.00 | 0.00 | 1.00 | 1.00 | 1.00    | 0.00 | 0.00 | 1.00 |
| 2.00 | 2.00 | 0.00 | 1.00 | 1.00 | 1.00    | 0.00 | 0.00 | 0.00 |
| 2.00 | 2.00 | 0.00 | 1.00 | 0.00 | 0.00    | 0.00 | 0.00 | 1.00 |
| 2.00 | 0.00 | 0.00 | 1.00 | 1.00 | 1.00    | 0.00 | 0.00 | 0.00 |
| 0.00 | 0.00 | 0.00 | 1.00 | 1.00 | 0.00    | 0.00 | 0.00 | 1.00 |
| 2.00 | 2.00 | 1.00 | 1.00 | 1.00 | 1.00    | 0.00 | 1.00 | 1.00 |
| 0.00 | 0.00 | 1.00 | 0.00 | 1.00 | 1.00    | 0.00 | 0.00 | 0.00 |
| 0.00 | 0.00 | 0.00 | 1.00 | 1.00 | 2.00    | 0.00 | 0.00 | 0.00 |
| 2.00 | 2.00 | 0.00 | 1.00 | 1.00 | 0.00    | 0.00 | 0.00 | 1.00 |
| 0.00 | 0.00 | 0.00 | 0.00 | 0.00 | 1.00    | 0.00 | 0.00 | 0.00 |
| 0.00 | 0.00 | 1.00 | 1.00 | 0.00 | 2.00    | 1.00 | 0.00 | 0.00 |
| 2.00 | 2.00 | 1.00 | 1.00 | 0.00 | 1.00    | 0.00 | 0.00 | 1.00 |
| 4.00 | 4.00 | 1.00 | 0.00 | 0.00 | 2.00    | 0.00 | 0.00 | 1.00 |
| 0.00 | 0.00 | 0.00 | 1.00 | 0.00 | 1.00    | 0.00 | 0.00 | 1.00 |
| 2.00 | 0.00 | 0.00 | 1.00 | 0.00 | 0.00    | 0.00 | 1.00 | 1.00 |
| 2.00 | 2.00 | 1.00 | 1.00 | 1.00 | 1.00    | 1.00 | 0.00 | 0.00 |
| 4.00 | 4.00 | 0.00 | 1.00 | 0.00 | 1.00    | 0.00 | 1.00 | 1.00 |
| 2.00 | 0.00 | 0.00 | 1.00 | 1.00 | 0.00    | 0.00 | 0.00 | 1.00 |
| 0.00 | 0.00 | 0.00 | 1.00 | 0.00 | 0.00    | 0.00 | 0.00 | 1.00 |
| 0.00 | 0.00 | 0.00 | 1.00 | 0.00 | 0.00    | 0.00 | 0.00 | 1.00 |
| 0.00 | 0.00 | 0.00 | 1.00 | 1.00 | 0.00    | 0.00 | 0.00 | 0.00 |
| 2.00 | 0.00 | 0.00 | 1.00 | 0.00 | 0.00    | 0.00 | 1.00 | 1.00 |
| 0.00 | 0.00 | 0.00 | 1.00 | 1.00 | #NULLO! | 0.00 | 0.00 | 1.00 |
| 2.00 | 2.00 | 0.00 | 1.00 | 0.00 | 1.00    | 0.00 | 1.00 | 1.00 |
| 0.00 | 0.00 | 1.00 | 1.00 | 1.00 | 0.00    | 0.00 | 0.00 | 0.00 |
| 2.00 | 2.00 | 1.00 | 0.00 | 0.00 | 0.00    | 0.00 | 1.00 | 1.00 |
| 2.00 | 2.00 | 0.00 | 1.00 | 0.00 | 0.00    | 1.00 | 1.00 | 1.00 |
| 0.00 | 0.00 | 1.00 | 1.00 | 0.00 | 1.00    | 0.00 | 0.00 | 1.00 |
| 0.00 | 0.00 | 1.00 | 1.00 | 0.00 | 0.00    | 1.00 | 0.00 | 0.00 |
| 0.00 | 0.00 | 0.00 | 1.00 | 0.00 | 0.00    | 0.00 | 0.00 | 0.00 |
| 0.00 | 0.00 | 1.00 | 1.00 | 0.00 | 1.00    | 0.00 | 0.00 | 1.00 |
| 0.00 | 0.00 | 0.00 | 0.00 | 1.00 | 1.00    | 0.00 | 1.00 | 1.00 |
| 0.00 | 0.00 | 0.00 | 1.00 | 1.00 | 0.00    | 1.00 | 1.00 | 1.00 |

|      |      |      |      |      |         |      |      |      |
|------|------|------|------|------|---------|------|------|------|
| 0.00 | 0.00 | 0.00 | 0.00 | 0.00 | 1.00    | 0.00 | 1.00 | 1.00 |
| 0.00 | 0.00 | 0.00 | 1.00 | 1.00 | 1.00    | 0.00 | 0.00 | 0.00 |
| 0.00 | 0.00 | 0.00 | 0.00 | 1.00 | 0.00    | 0.00 | 1.00 | 1.00 |
| 0.00 | 0.00 | 1.00 | 1.00 | 1.00 | 0.00    | 0.00 | 0.00 | 1.00 |
| 0.00 | 0.00 | 1.00 | 0.00 | 1.00 | 1.00    | 0.00 | 0.00 | 0.00 |
| 4.00 | 0.00 | 0.00 | 0.00 | 1.00 | 1.00    | 0.00 | 0.00 | 1.00 |
| 0.00 | 0.00 | 0.00 | 0.00 | 0.00 | 1.00    | 0.00 | 0.00 | 1.00 |
| 2.00 | 2.00 | 0.00 | 1.00 | 1.00 | 0.00    | 0.00 | 1.00 | 1.00 |
| 2.00 | 2.00 | 0.00 | 1.00 | 1.00 | 1.00    | 0.00 | 0.00 | 1.00 |
| 2.00 | 2.00 | 1.00 | 1.00 | 0.00 | 0.00    | 0.00 | 1.00 | 1.00 |
| 2.00 | 2.00 | 1.00 | 1.00 | 1.00 | 0.00    | 0.00 | 0.00 | 1.00 |
| 4.00 | 4.00 | 1.00 | 1.00 | 1.00 | 1.00    | 0.00 | 0.00 | 0.00 |
| 2.00 | 2.00 | 0.00 | 0.00 | 0.00 | 1.00    | 0.00 | 0.00 | 0.00 |
| 2.00 | 2.00 | 0.00 | 1.00 | 1.00 | 0.00    | 0.00 | 1.00 | 1.00 |
| 2.00 | 0.00 | 0.00 | 0.00 | 1.00 | 1.00    | 1.00 | 0.00 | 1.00 |
| 2.00 | 2.00 | 1.00 | 1.00 | 1.00 | 0.00    | 0.00 | 0.00 | 1.00 |
| 0.00 | 0.00 | 0.00 | 0.00 | 0.00 | 1.00    | 0.00 | 0.00 | 1.00 |
| 2.00 | 2.00 | 0.00 | 1.00 | 1.00 | 1.00    | 1.00 | 0.00 | 0.00 |
| 0.00 | 0.00 | 0.00 | 1.00 | 0.00 | 1.00    | 0.00 | 0.00 | 1.00 |
| 2.00 | 2.00 | 0.00 | 0.00 | 1.00 | 0.00    | 0.00 | 1.00 | 1.00 |
| 0.00 | 0.00 | 1.00 | 1.00 | 0.00 | 1.00    | 0.00 | 0.00 | 0.00 |
| 0.00 | 0.00 | 1.00 | 1.00 | 1.00 | 1.00    | 1.00 | 1.00 | 1.00 |
| 0.00 | 0.00 | 1.00 | 0.00 | 0.00 | 2.00    | 0.00 | 0.00 | 0.00 |
| 0.00 | 0.00 | 0.00 | 1.00 | 1.00 | 0.00    | 0.00 | 1.00 | 1.00 |
| 0.00 | 0.00 | 0.00 | 1.00 | 0.00 | 1.00    | 0.00 | 0.00 | 0.00 |
| 4.00 | 4.00 | 0.00 | 1.00 | 1.00 | 0.00    | 0.00 | 1.00 | 1.00 |
| 2.00 | 2.00 | 0.00 | 1.00 | 1.00 | #NULLO! | 0.00 | 0.00 | 0.00 |
